# Supplementary material
Source: PubMed Central journal article supplement (PMC2397365)
Supplement: 107.118554_2.pdf [file 107.118554_2.pdf]

# Supporting Online Information: Implementation of the simulations

July 30, 2007

We have adapted the Gillespie algorithm for chemical reactions [1], which was originally thought for spatially homogeneous systems, to the case of particle transitions with spatio-temporal dependent rates. There are other existing Monte Carlo methods to perform the simulations (see e.g. [2]).

The system is characterized by a rate matrix  $k_{i,j}$ , where  $i \in [0, N]$  specifies the site and  $j \in [0, r - 1]$  the motor transition ( $r$  being the number of possible motor transitions;  $r = 5$  in the present case). We order the transitions as follows:  $k_{i,0} = k_f(i)$ ,  $k_{i,1} = k_u(i)$ , and  $k_{i,2} = k_b(i)$ ,  $k_{i,3} = k_{i,4} = k_d(i)$ . Note that the rate matrix does not contain information about the motors occupying the sites. In order to account for the actual potential transitions, we define a global array in the system,  $a_l$ , with  $l \in [0, N r]$ , that characterizes the rates of all possible potential transitions, and it is defined as the number of motors that can undergo a particular transition times the rate of that transition:  $a_{i r} = n_b(i)k_{i,0}$ ,  $a_{i r+1} = n_b(i)k_{i,1}$ ,  $a_{i r+2} = n_u(i)k_{i,2}$ ,  $a_{i r+3} = n_u(i)k_{i,3}$  and  $a_{i r+4} = n_u(i)k_{i,4}$ , where  $n_b(i) \in [0, 1] \subset \mathbb{N}$  and  $n_u(i) \in \mathbb{N}$  are, respectively, the number of bound and unbound motors at site  $i$  (occupation numbers). Once the potential transition rates are given, we define the global transition rate as

$$k_g \equiv \sum_{l=0}^{N r} a_l . \quad (1)$$

Unlike discrete-time Monte Carlo simulations, where the time step of the simulation is set *a priori*, here it is necessary to know the time  $\Delta t$  at which the next transition takes place. This time is a stochastic variable distributed exponentially with a characteristic time scale  $1/k_g$ . Note that this time does not specify a particular transition of a certain motor, but only determines how long we have to wait to see a motor (no matter which) performing a transition. The actual transition that takes place is a stochastic variable distributed uniformly and is calculated as follows. Generate a stochastic number  $y$  distributed uniformly in the range  $[0, k_g]$  and define  $m$  as an integer number in the range  $[0, N r]$ . The value of  $m$  that specifies the transition that occurs is the largest

value of  $m \in [0, N r]$  that fulfills the following inequality:

$$\sum_{l=0}^m a_l < y . \quad (2)$$

The actual site  $i$  at which the transition takes place and the particular transition  $j$ , are given respectively by the quotient and the remainder of  $m/r$ .

The simulation evolves as follows. The system is initialized in a configuration with an initial number  $M_i$  of consecutive bound motors, the first one defining the position of the very tip of the tube, so that the initial length of the tube  $N$  is  $N = M_i$ . Then, the rate matrix is calculated, and the array  $a_l$  is obtained from the system configuration and the rates. The value of the global transition rate  $k_g$  is calculated for the initial configuration. Then, the following steps are repeated until a maximal time  $t_{max}$ :

- (step 1) Determine the stochastic time  $\Delta t$  at which the next transition occurs, the site  $i$  at which the transition takes place and the actual transition  $j$ .
- (step 2) The transition is performed if allowed by excluded volume interactions and the time  $t$  is updated to  $t + \Delta t$ .
- (step 3) The transition rates  $k_{i,j}$  are then updated with the new configuration.
- (step 4) The array  $a_j$  is updated with the new configuration and value for the rates.
- (step 5) The global transition rate  $k_g$  is updated.
- (step 6) Go back to step 1.

This part of the algorithm determines the transitions of the motors, given the rate matrix and a particular configuration, but does not specify the dynamics of tube growth. The dynamics of the tube is specified by the rates of the motors (and their force dependence), and by a set of special rules for the growth events, which are defined in the main text.

## References

- [1] Gillespie DT (1976) *J Comp Phys* 22:403-434.
- [2] Newman MEJ, Barkema GT, *Monte Carlo Methods in Statistical Physics* (Clarendon Press, 1999).
